# Supplementary material
Source: PubMed Central journal article supplement (PMC6819660)

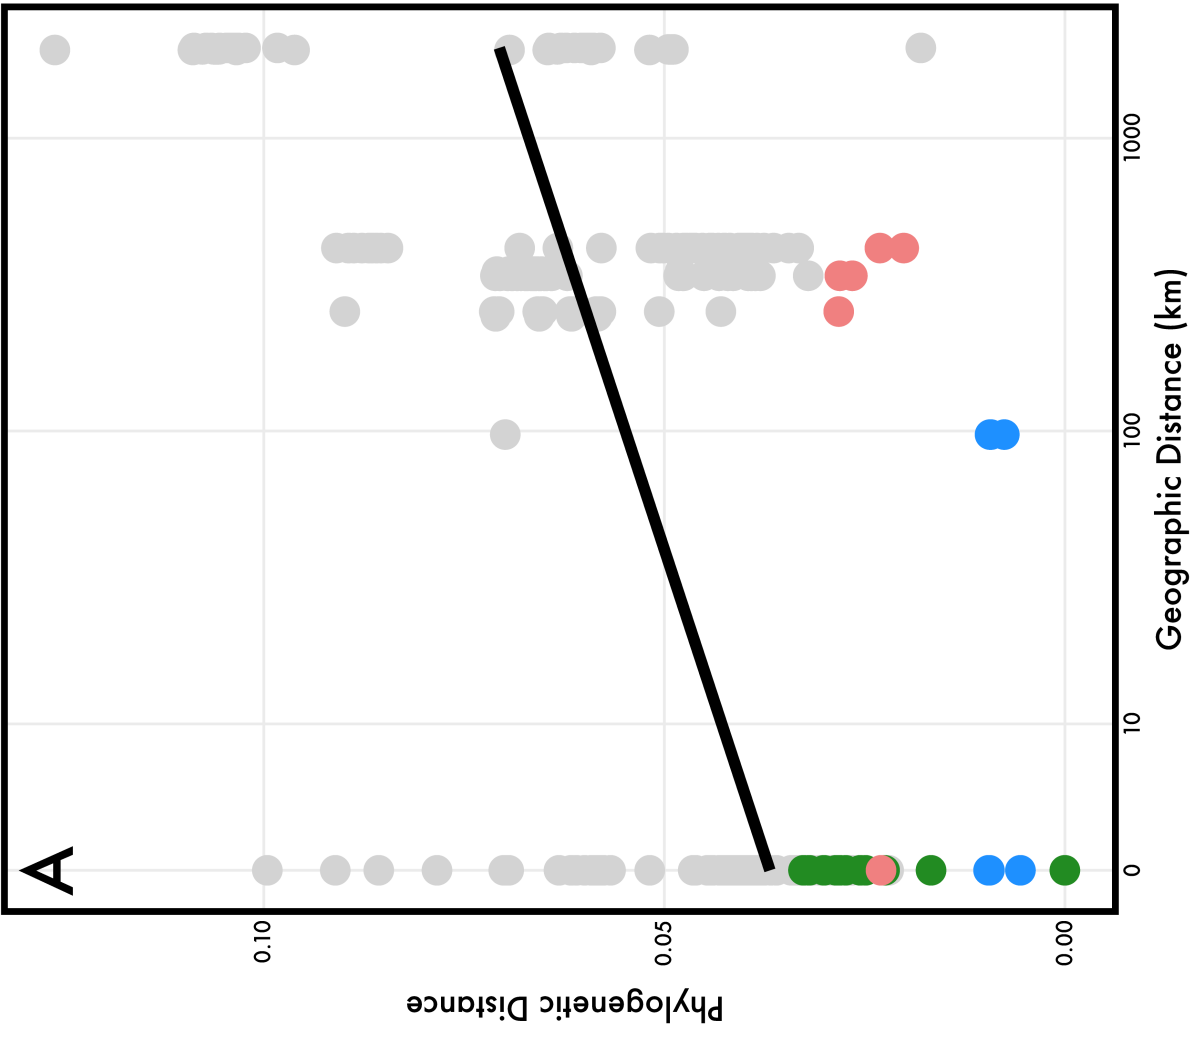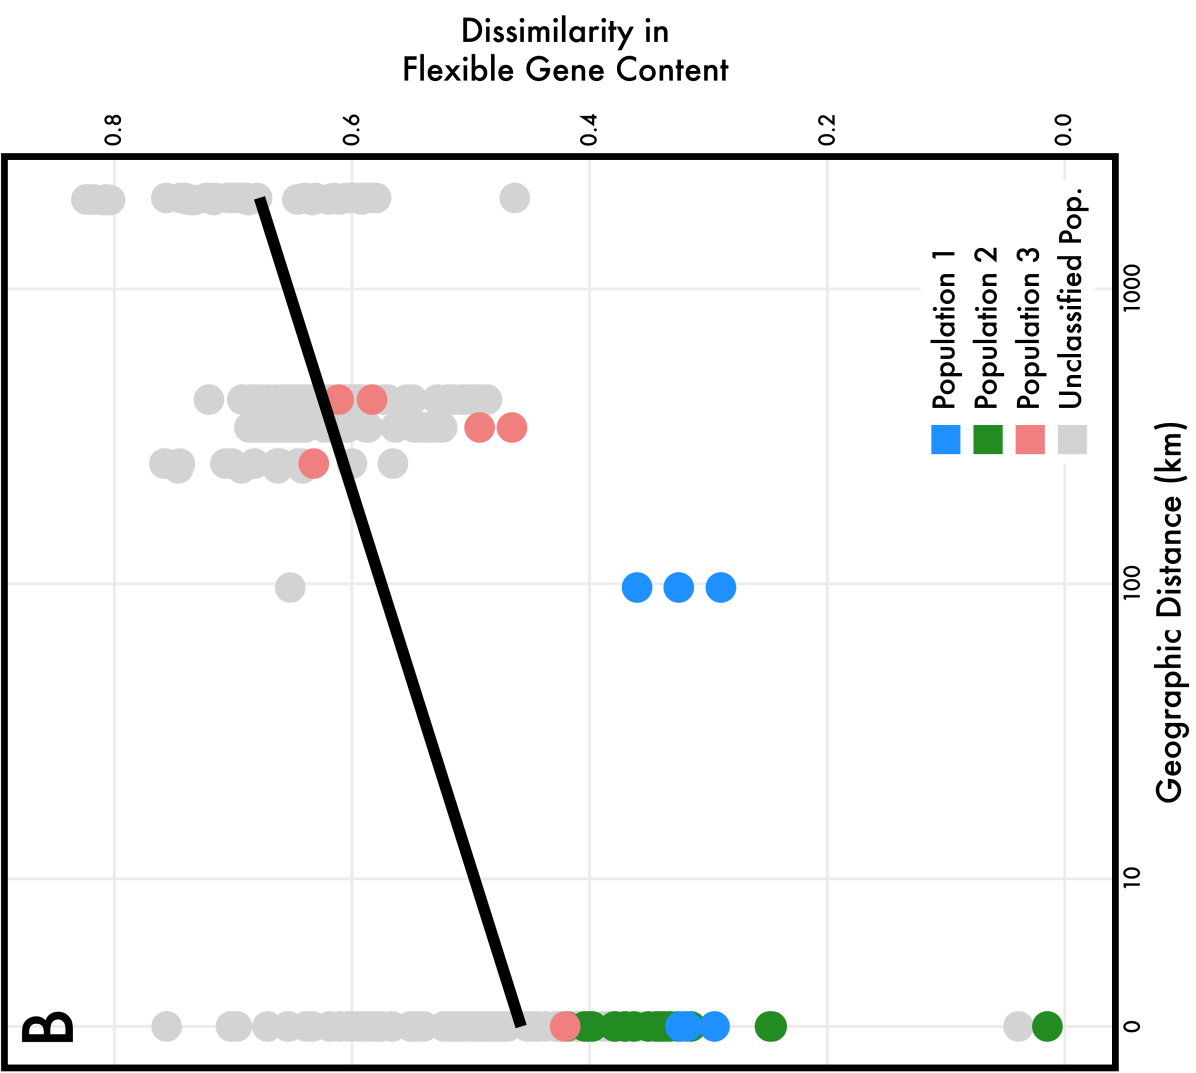

Supplement: mBio.02361-19-sf002.pdf [file mBio.02361-19-sf002.pdf]

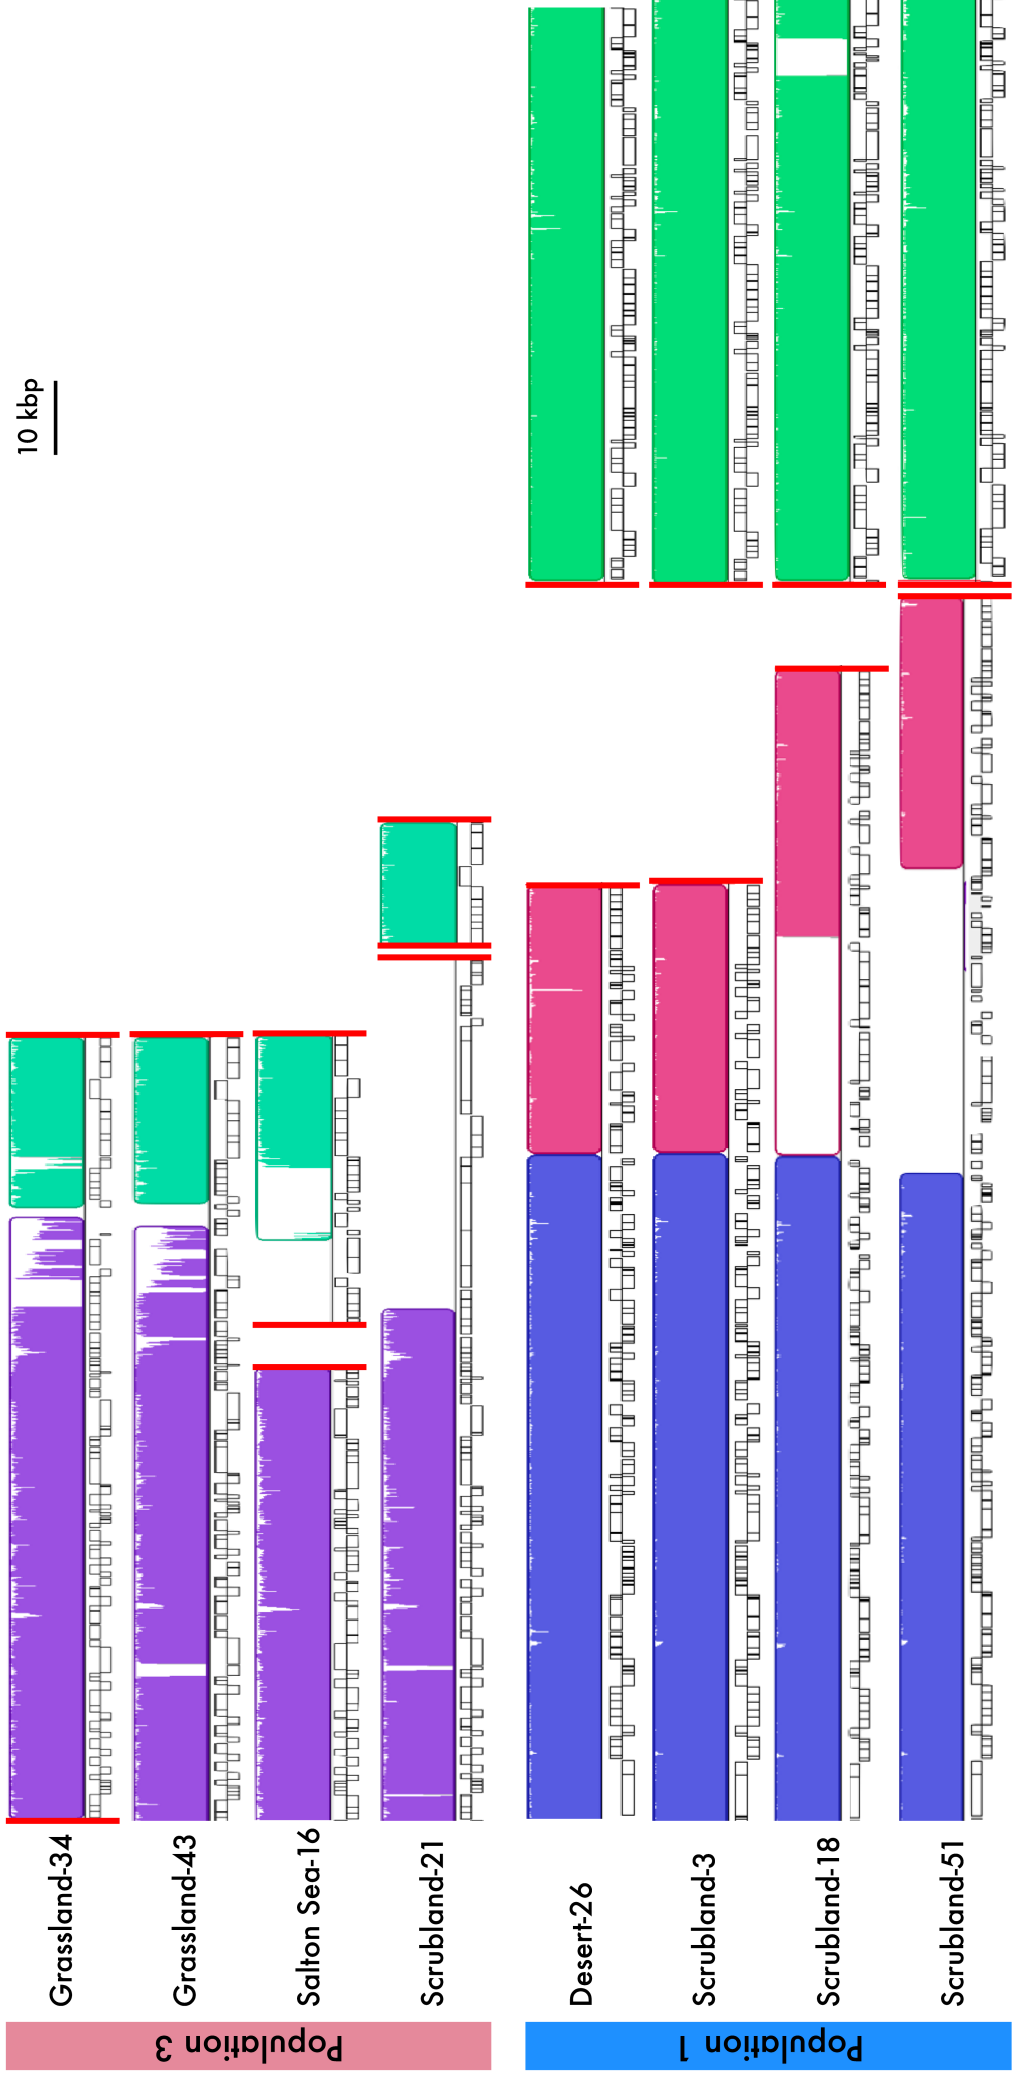

Supplement: mBio.02361-19-sf004.pdf [file mBio.02361-19-sf004.pdf]
